# Supplementary material
Source: Elsevier journal article supplement (https://www.sciencedirect.com/science/article/pii/S0210569121000036)

## Material Electrónico Suplementario (MES):

### *Análisis coste-beneficio:*

El análisis compara dos decisiones terapéuticas: la estrategia estándar fue la ventilación mecánica invasiva (VMI) al ingreso en UCI, y la estrategia experimental, una estrategia mixta consistente en la aplicación inicial de HFNC y aplicación de VMI sólo a los fracasos del HFNC. En este caso, la variable de resultado clínico fue el alta de UCI. La efectividad entre los tratamientos comparados fue valorada como la diferencia de probabilidad de alta de la UCI y su inversa, el número de pacientes que es necesario tratar (NNT) para conseguir un alta de la UCI. Los costes promedio de estancia se obtuvieron de los datos suministrados por la Unidad de Gestión Económica del Hospital, y se calcularon sumando los costes promedio de hospitalización (costes directos de personal y funcionamiento, así como los costes estructurales e intermedios) y los derivados del uso de ambos sistemas de ventilación mecánica. La decisión racional óptima se definió como la que maximizaba la utilidad esperada, y la eficiencia económica se evaluó mediante el cálculo de la Razón de Coste-Efectividad Incremental (RCEI). Por tratarse de muestras pequeñas, la comparación se ha hecho utilizando el modelo bayesiano conjugado beta-binomial, con el intervalo del 95% de credibilidad.

Tabla 1 MES: Características basales, clínico-epidemiológicas, de los pacientes ingresados con neumonía por SARS-CoV-2 confirmada.

| Variables                                                               | Total (n=67)   |
|-------------------------------------------------------------------------|----------------|
| <b>Edad (media(DE))</b>                                                 | 59 (16)        |
| <b>Sexo</b>                                                             |                |
| Hombres (n (%))                                                         | 46 (69%)       |
| <b>Co-morbilidades</b>                                                  |                |
| HTA (n (%))                                                             | 33 (49%)       |
| DM (n (%))                                                              | 14 (21%)       |
| Obesidad (n (%))                                                        | 11 (16%)       |
| Dislipemia (n (%))                                                      | 17 (25%)       |
| Fumador (n (%))                                                         | 23 (34%)       |
| <b>Tratamiento frente SARS-CoV-2</b>                                    |                |
| Kaletra                                                                 | 55 (82%)       |
| Hidroxiclороquina                                                       | 59 (88%)       |
| Tocilizumab                                                             | 57 (85%)       |
| Corticoide                                                              | 16 (24%)       |
| Suero hiperinmune                                                       | 2 (3%)         |
| Interferón B                                                            | 13 (19%)       |
| <b>Días desde ingreso hospitalario hasta ingreso en UCI (media(DE))</b> | 6 (14)         |
| <b>PaO<sub>2</sub>/FiO<sub>2</sub> al ingreso en UCI (media(DE))</b>    | 110 (46)       |
| <b>SpO<sub>2</sub>/FiO<sub>2</sub> al ingreso en UCI (media(DE))</b>    | 106,00 (25,42) |
| <b>Frecuencia respiratoria al ingreso en UCI</b>                        | 29,68 (6,42)   |
| <b>Datos de laboratorio al ingreso en UCI</b>                           |                |
| Creatin Kinasa                                                          | 901 (1433)     |
| Dímero D                                                                | 23188 (34265)  |
| Interleukina-6                                                          | 174 (152)      |
| PCR                                                                     | 22 (7,49)      |
| LDH                                                                     | 592 (384)      |
| Ferritina                                                               | 1513 (1074)    |
| <b>Tratamiento VMI al ingreso</b>                                       | 45 (67%)       |
| <b>Parámetros iniciales de VMI</b>                                      |                |
| Volumen tidal                                                           | 474 (39)       |
| PEEP                                                                    | 14 (3)         |
| Frecuencia respiratoria                                                 | 17 (3)         |
| P. plateau                                                              | 24 (3)         |
| Driving Pressure                                                        | 10 (4)         |
| Compliance                                                              | 48 (19)        |
| <b>Tratamiento HFNO al ingreso</b>                                      | 20 (30%)       |
| <b>Días de VMI</b>                                                      | 14 (12)        |
| <b>Días de HFNO</b>                                                     | 3 (2)          |
| <b>Decúbito PRONO</b>                                                   | 43 (64%)       |
| <b>Horas en PRONO</b>                                                   | 71 (53)        |
| <b>Estancia en UCI</b>                                                  | 16 (15)        |
| <b>Estancia Hospitalaria</b>                                            | 23 (13)        |
| <b>Mortalidad intra-UCI</b>                                             | 15 (22%)       |

HTA: hipertension arteria; DM: diabetes mellitus; IOT: intubación orotraqueal; DP: driving pressure.

**Figuras:**

Figura 1: Árbol de decisión, resultado final, coste económico y valores de estancias medias de cada uno de los subgrupos.

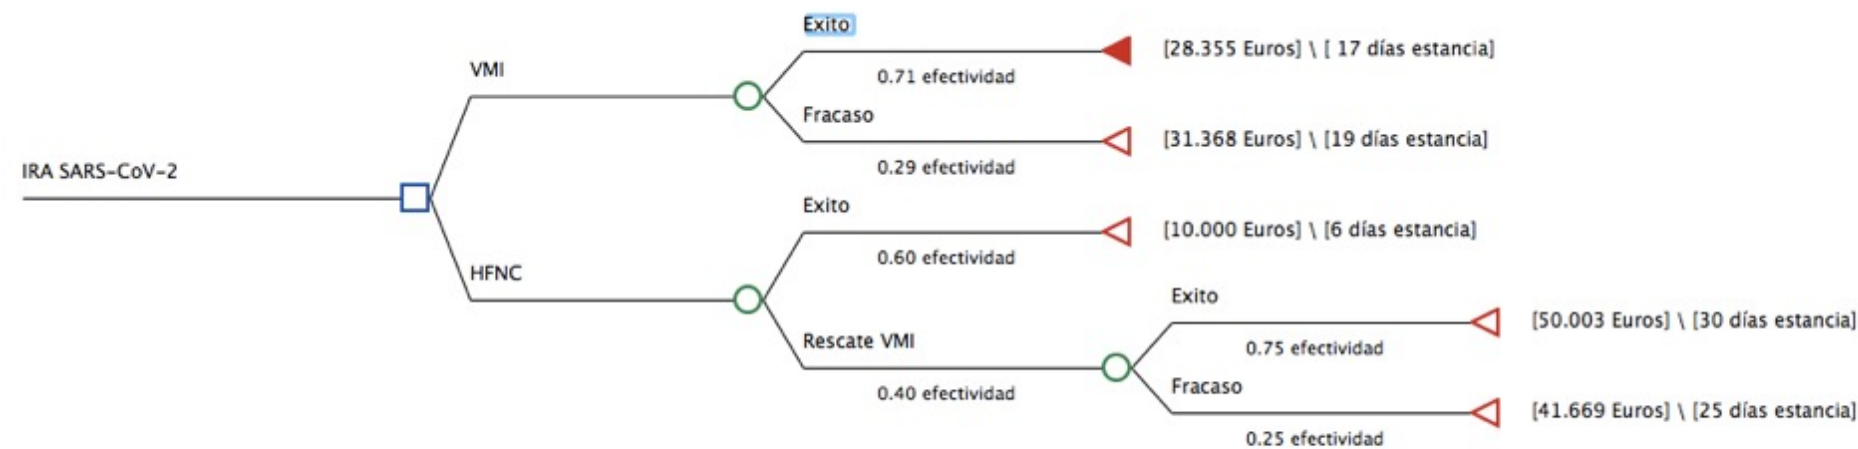

Supplement: mmc1 [file S0210569121000036:mmc1.pdf]
